# Supplementary material for: Evaluation of the Lipophilicity of Angularly Condensed Diquino- and Quinonaphthothiazines as Potential Candidates for New Drugs
Source: MDPI journal article supplement (doi:10.3390/molecules29071683), 2024-04-08
Supplement: s1 [file s1]

# Evaluation of the Lipophilicity of Angularly Condensed Diquino- and Quinonaphthothiazines as Potential Candidates for New Drugs

Daria Klimoszek <sup>1</sup>, Małgorzata Jeleń <sup>2,\*</sup>, Beata Morak-Młodawska <sup>2</sup> and Małgorzata Dołowy <sup>3</sup>

<sup>1</sup> Faculty of Pharmaceutical Sciences in Sosnowiec, Doctoral School, Medical University of Silesia in Katowice, Poland; d201204@365.sum.edu.pl (D.K.)

<sup>2</sup> Department of Organic Chemistry, Faculty of Pharmaceutical Sciences in Sosnowiec, Medical University of Silesia in Katowice, Jagiellońska 4, 41-200 Sosnowiec, Poland; bmlodawska@sum.edu.pl (B.M.M.)

<sup>3</sup> Department of Analytical Chemistry, Faculty of Pharmaceutical Sciences in Sosnowiec, Medical University of Silesia in Katowice, 41-200 Sosnowiec, Poland; mdolowy@sum.edu.pl (M.D.)

\* Correspondence: manowak@sum.edu.pl

## Content:

- |                                                                                                                                                         |   |
|---------------------------------------------------------------------------------------------------------------------------------------------------------|---|
| 1. Table S1. Obtained linear correlations between theoretical and chromatographic parameters of lipophilicity of the tested compounds <b>1–21</b> .     | 2 |
| 2. Table S2. The molecular descriptors for compounds <b>1–21</b> .                                                                                      | 2 |
| 3. Table S3. The correlation of the logP <sub>TLC</sub> values with the molecular descriptors and predicted ADME activities for compounds <b>1–21</b> . | 3 |
| 4. Table S4. The parameters of Lipinski's, Ghose's, Veber's and Egan's rules for compounds <b>1–21</b> .                                                | 3 |

**Table S1.** Obtained linear correlations between theoretical and chromatographic parameters of lipophilicity of the tested compounds **1–21**. (r - correlation coefficient; s - standard error of estimation; p - significance level; F- ratio).

| Compounds   | Lipophilicity parameter | Equation                             | r     | p-value | s     | F-ratio |
|-------------|-------------------------|--------------------------------------|-------|---------|-------|---------|
| <b>1-21</b> | AClogP                  | $AClogP = 0.8996logP_{TLC} + 0.7407$ | 0.670 | 0.000   | 0.488 | 18.22   |
| <b>1-21</b> | MLOGP                   | $MLOGP = 0.7383logP_{TLC} - 0.1778$  | 0.563 | 0.008   | 0.574 | 8.84    |
| <b>1-21</b> | XLOGP2                  | $XLOGP2 = 0.7824logP_{TLC} + 1.3324$ | 0.578 | 0.006   | 0.586 | 9.53    |
| <b>1-21</b> | XLOGP3                  | $XLOGP3 = 0.6477logP_{TLC} + 1.6152$ | 0.570 | 0.007   | 0.495 | 9.16    |
| <b>1-21</b> | LogP                    | $LogP = 0.6969logP_{TLC} + 1.5062$   | 0.616 | 0.003   | 0.472 | 11.64   |
| <b>1-21</b> | ClogP                   | $ClogP = 0.5503logP_{TLC} + 2.7581$  | 0.450 | 0.041   | 0.579 | 4.83    |

**Table S2.** The molecular descriptors for compounds **1–21**.

| Compounds | Molar mass (M) | Molar volume (V <sub>M</sub> ) | Molar refractivity (Ref <sub>M</sub> ) |
|-----------|----------------|--------------------------------|----------------------------------------|
| <b>1</b>  | 301.37         | 254.81                         | 87.58                                  |
| <b>2</b>  | 315.39         | 271.91                         | 92.58                                  |
| <b>3</b>  | 341.43         | 299.73                         | 102.03                                 |
| <b>4</b>  | 339.11         | 294.25                         | 100.16                                 |
| <b>5</b>  | 301.37         | 254.81                         | 87.58                                  |
| <b>6</b>  | 315.39         | 271.75                         | 92.58                                  |
| <b>7</b>  | 341.43         | 299.73                         | 102.03                                 |
| <b>8</b>  | 339.11         | 294.25                         | 100.16                                 |
| <b>9</b>  | 301.37         | 254.81                         | 87.58                                  |
| <b>10</b> | 315.39         | 271.75                         | 92.58                                  |
| <b>11</b> | 301.37         | 254.81                         | 87.58                                  |
| <b>12</b> | 315.39         | 271.75                         | 92.58                                  |
| <b>13</b> | 341.43         | 299.73                         | 102.03                                 |
| <b>14</b> | 300.38         | 258.97                         | 90.06                                  |
| <b>15</b> | 314.40         | 275.91                         | 95.06                                  |
| <b>16</b> | 340.44         | 303.88                         | 104.51                                 |
| <b>17</b> | 338.43         | 298.41                         | 102.65                                 |
| <b>18</b> | 300.38         | 258.97                         | 90.06                                  |
| <b>19</b> | 314.40         | 275.91                         | 95.06                                  |
| <b>20</b> | 340.44         | 303.88                         | 104.51                                 |
| <b>21</b> | 338.43         | 298.41                         | 102.65                                 |

**Table S3.** The correlation of the logP<sub>TLC</sub> values with the molecular descriptors and predicted ADME activities for compounds **1–21**. (r - correlation coefficient; s - standard error of estimation; p - significance level; F- ratio).

| Compounds   | Molecular Descriptor and ADME Activities | Equation                                | r     | p-value | s      | F-ratio |
|-------------|------------------------------------------|-----------------------------------------|-------|---------|--------|---------|
| <b>1-21</b> | Molar volume                             | $V_M = 15.62\log P_{TLC} + 194.72$      | 0.428 | 0.053   | 17.481 | 4.27    |
| <b>1-21</b> | Molar refractivity                       | $Ref_M = 5.3645\log P_{TLC} + 66.692$   | 0.445 | 0.043   | 5.734  | 4.68    |
| <b>1-21</b> | Caco-2                                   | $Caco-2 = -42.984\log P_{TLC} + 421.64$ | 0.451 | 0.040   | 45.196 | 4.84    |
| <b>1-21</b> | P-gp                                     | $P-gp = 0.0411\log P_{TLC} + 0.1211$    | 0.584 | 0.005   | 0.030  | 9.86    |
| <b>1-21</b> | CYP2C9                                   | $CYP2C9 = -0.0387\log P_{TLC} + 0.5331$ | 0.417 | 0.062   | 0.045  | 3.99    |
| <b>1-21</b> | CYP2C19                                  | $CYP2C19 = 0.0209\log P_{TLC} + 0.4000$ | 0.459 | 0.036   | 0.021  | 5.08    |
| <b>1-21</b> | CYP3A4                                   | $CYP3A4 = -0.0212\log P_{TLC} + 0.6513$ | 0.439 | 0.046   | 0.023  | 4.54    |

**Table S4.** The parameters of Lipinski's, Ghose's, Veber's and Egan's rules for compounds **1–21**.

| Compounds | H-Bond Acceptors | H-Bond Donors | Rotatable Bonds | TPSA [Å <sup>2</sup> ] | Lipinski's Rules | Ghose's Rules | Veber's Rules | Egan's Rules |
|-----------|------------------|---------------|-----------------|------------------------|------------------|---------------|---------------|--------------|
| <b>1</b>  | 2                | 1             | 0               | 63.11                  | +                | +             | +             | +            |
| <b>2</b>  | 2                | 0             | 0               | 54.32                  | +                | +             | +             | +            |
| <b>3</b>  | 2                | 0             | 2               | 54.32                  | +                | +             | +             | +            |
| <b>4</b>  | 2                | 0             | 1               | 54.32                  | +                | +             | +             | +            |
| <b>5</b>  | 2                | 1             | 0               | 63.11                  | +                | +             | +             | +            |
| <b>6</b>  | 2                | 0             | 0               | 54.32                  | +                | +             | +             | +            |
| <b>7</b>  | 2                | 0             | 2               | 54.32                  | +                | +             | +             | +            |
| <b>8</b>  | 2                | 0             | 1               | 54.32                  | +                | +             | +             | +            |
| <b>9</b>  | 2                | 1             | 0               | 63.11                  | +                | +             | +             | +            |
| <b>10</b> | 2                | 1             | 0               | 63.11                  | +                | +             | +             | +            |
| <b>11</b> | 2                | 1             | 0               | 63.11                  | +                | +             | +             | +            |
| <b>12</b> | 2                | 0             | 0               | 54.32                  | +                | +             | +             | +            |
| <b>13</b> | 2                | 0             | 0               | 54.32                  | +                | +             | +             | +            |
| <b>14</b> | 1                | 1             | 0               | 50.22                  | +                | +             | +             | +            |
| <b>15</b> | 1                | 0             | 0               | 41.43                  | +                | +             | +             | +            |
| <b>16</b> | 1                | 0             | 2               | 41.43                  | +                | -             | +             | +            |
| <b>17</b> | 1                | 0             | 1               | 41.43                  | +                | +             | +             | +            |
| <b>18</b> | 1                | 1             | 0               | 50.22                  | +                | +             | +             | +            |
| <b>19</b> | 1                | 0             | 0               | 41.43                  | +                | +             | +             | +            |
| <b>20</b> | 1                | 0             | 2               | 41.43                  | +                | -             | +             | +            |
| <b>21</b> | 1                | 0             | 1               | 41.43                  | +                | +             | +             | +            |
